# Supplementary material for: Ab initio insights on the effect of embedding lanthanide atoms on nitrogenated holey doped graphene (g-C2N)
Source: Royal Society of Chemistry journal article supplement (doi:10.1039/c8tc00474a), 2018-01-01
Supplement: c8tc00474a1.pdf [file c8tc00474a1.pdf]

## ***Ab initio* insights on the effect of embedding lanthanide atoms on nitrogenated holey doped graphene (g-C<sub>2</sub>N)**

Cecil Naphtaly Moro Ouma,<sup>\*a</sup> Kingsley Onyebuchi Obodo<sup>b</sup>, Moritz Braun<sup>b</sup> and George Odhiambo Amolo<sup>c</sup>

<sup>a</sup> HySA Infrastructure Centre of Competence, Faculty of Engineering, North-West University (NWU), P. Bag X6001, Potchefstroom, 2520, South Africa.

<sup>\*</sup>E-mail: [Moro.Ouma@nwu.ac.za](mailto:Moro.Ouma@nwu.ac.za), [moronaphtaly84@gmail.com](mailto:moronaphtaly84@gmail.com).

<sup>b</sup> Physics Department, University of South Africa, P.O. Box 392, 0003 Pretoria, South Africa.

<sup>c</sup> Department of Physics and Space Science, The Technical University of Kenya, P.O. Box 52428-00200 Nairobi, Kenya.

### **Supplementary Material**

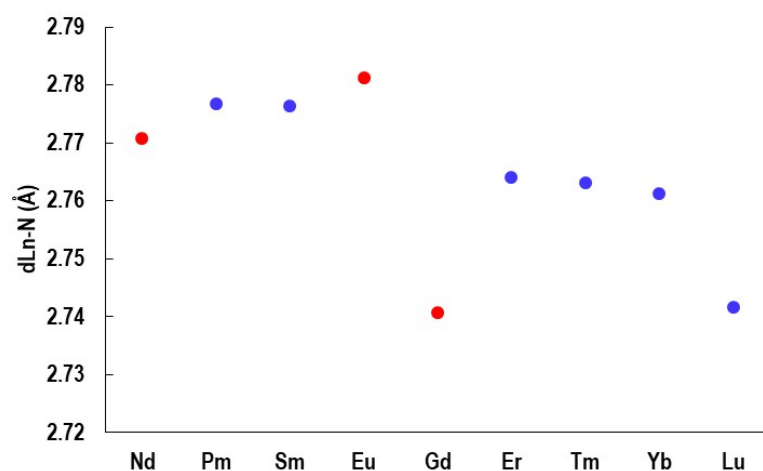

Supplementary Figure 1: Calculated lanthanide-nitrogen distance

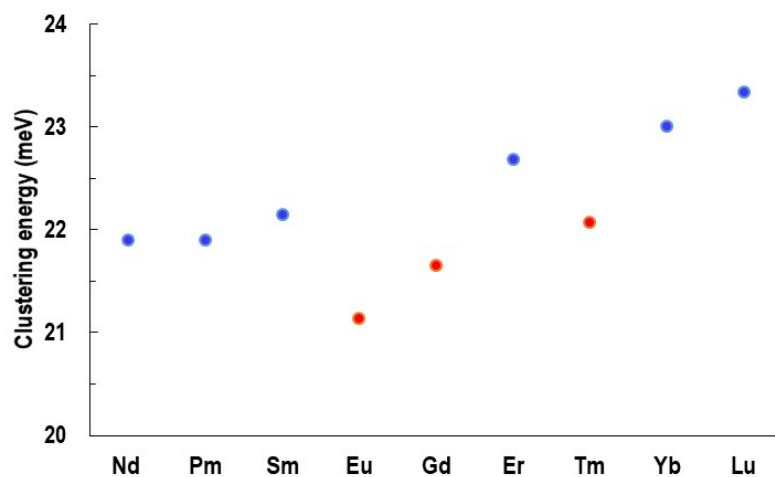

Supplementary Figure 2: Calculated clustering energy
